# Supplementary material
Source: MDPI journal article supplement (https://www.mdpi.com/2813-4583/2/2/12)
Supplement: s1 [file s1 › gucdd-2915756-supplementary.pdf]

# Sex-Specific Differences in Cytokine Production Capacity in Patients with Gout Compared to Controls

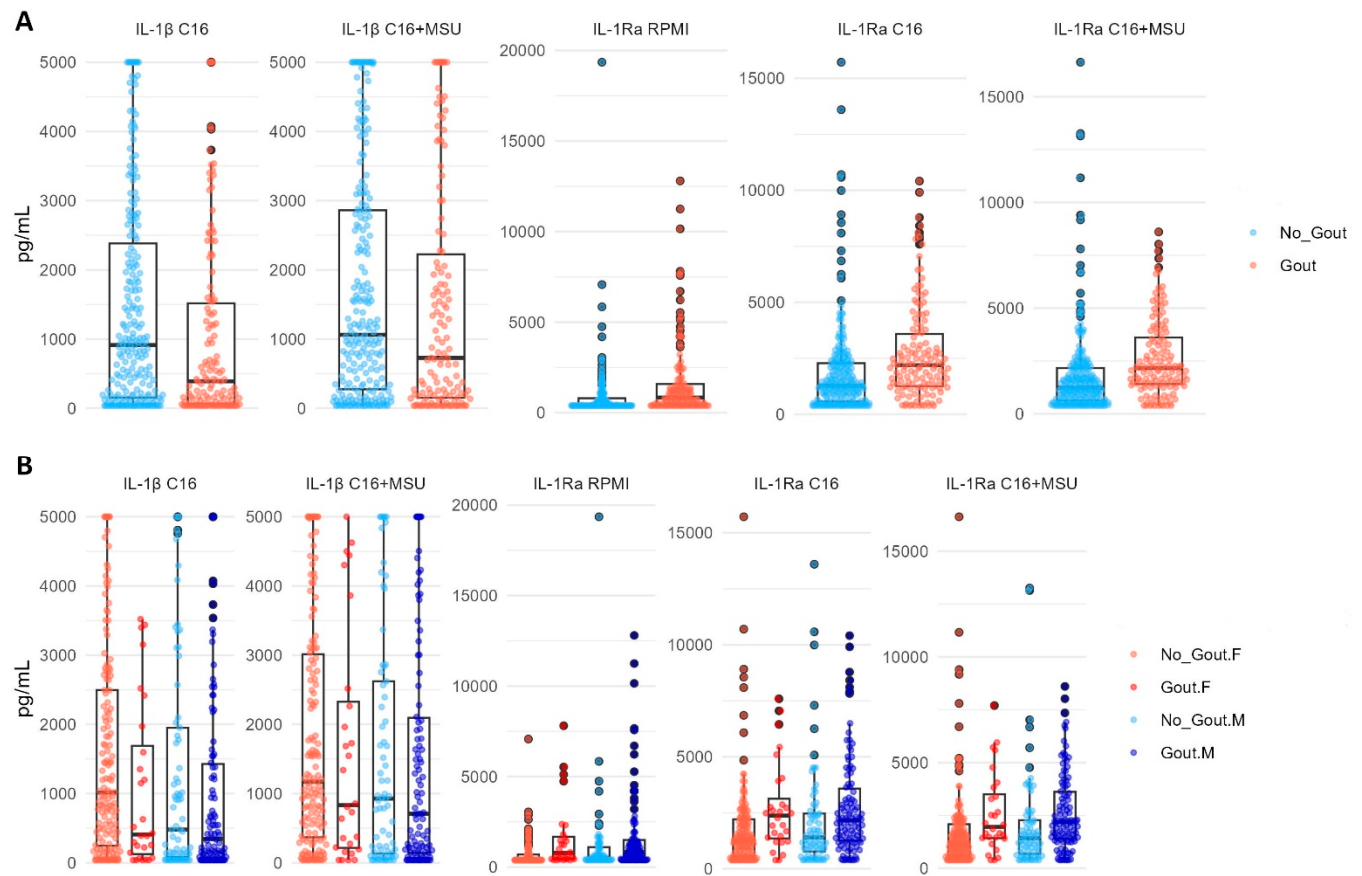

**Supplementary Figure S1.** Box plots showing distribution of cytokine levels in PBMCs from patients with and without gout (**A**) and split by sex (**B**) that were stimulated in vitro for 24h with C16 and C16+MSU.

**Supplementary Table S1.** Baseline characteristics of the gout and control cohorts in all patients included for experiment 1.

| Characteristic       | <i>n</i> | No_Gout, <i>n</i> = 227 <sup>1</sup> | Gout, <i>n</i> = 134 <sup>1</sup> | <i>p</i> -value <sup>2</sup> |
|----------------------|----------|--------------------------------------|-----------------------------------|------------------------------|
| <b>Sex</b>           | 361      |                                      |                                   | <0.001                       |
| F                    |          | 154 (68%)                            | 28 (21%)                          |                              |
| M                    |          | 73 (32%)                             | 106 (79%)                         |                              |
| <b>Age (years)</b>   | 361      | 61 (53, 69)                          | 62 (54, 68)                       | 0.8                          |
| <b>BMI</b>           | 354      | 28.7 (26.2, 32.0)                    | 29.7 (26.7, 33.1)                 | 0.035                        |
| Unknown              |          | 6                                    | 1                                 |                              |
| <b>Urate (mg/dL)</b> | 361      | 5.30 (4.30, 6.30)                    | 6.70 (5.53, 8.10)                 | <0.001                       |

<sup>1</sup>n (%); Median (IQR); <sup>2</sup>Pearson's Chi-squared test; Wilcoxon rank sum test.

**Supplementary Table S2.** Baseline characteristics only for the gout patients included for experiment 1.

| Characteristic       | <i>n</i> | F, <i>n</i> = 28 <sup>1</sup> | M, <i>n</i> = 106 <sup>1</sup> | <i>p</i> -value <sup>2</sup> |
|----------------------|----------|-------------------------------|--------------------------------|------------------------------|
| <b>Age (years)</b>   | 134      | 66 (62, 70)                   | 60 (51, 66)                    | 0.002                        |
| <b>BMI</b>           | 133      | 30.6 (28.0, 34.0)             | 29.4 (26.7, 32.3)              | 0.4                          |
| Unknown              |          | 0                             | 1                              |                              |
| <b>Urate (mg/dL)</b> | 134      | 6.60 (5.50, 7.55)             | 6.80 (5.53, 8.45)              | 0.2                          |

<sup>1</sup>Median (IQR); <sup>2</sup>Wilcoxon rank sum test.

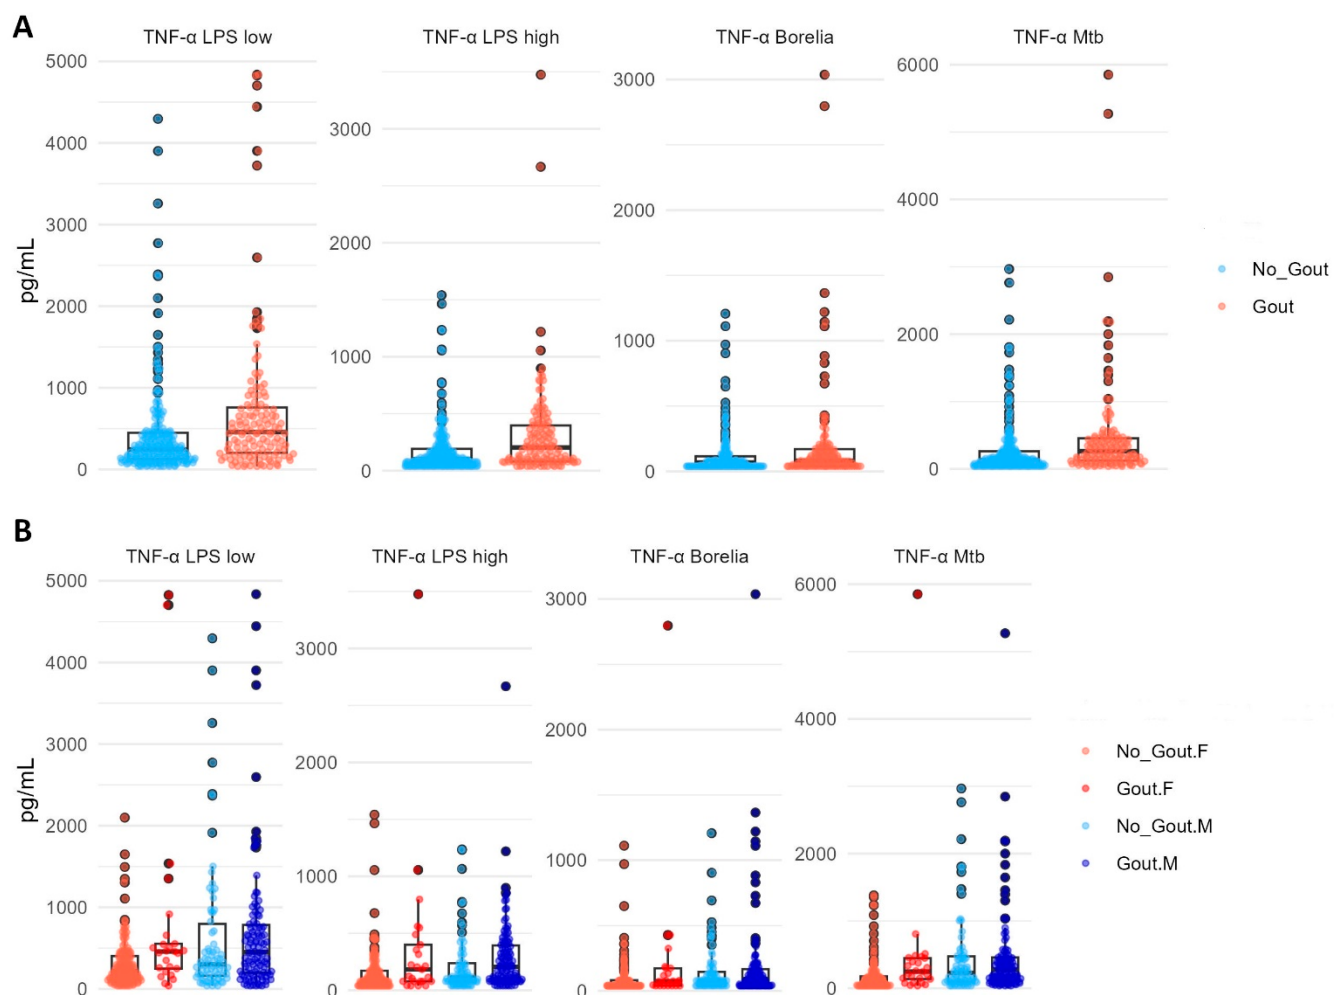

**Supplementary Figure S2.** Box plots showing distribution of TNF- $\alpha$  levels in PBMCs from patients with and without gout (**A**) and split by sex (**B**) that were stimulated in vitro for 24h.

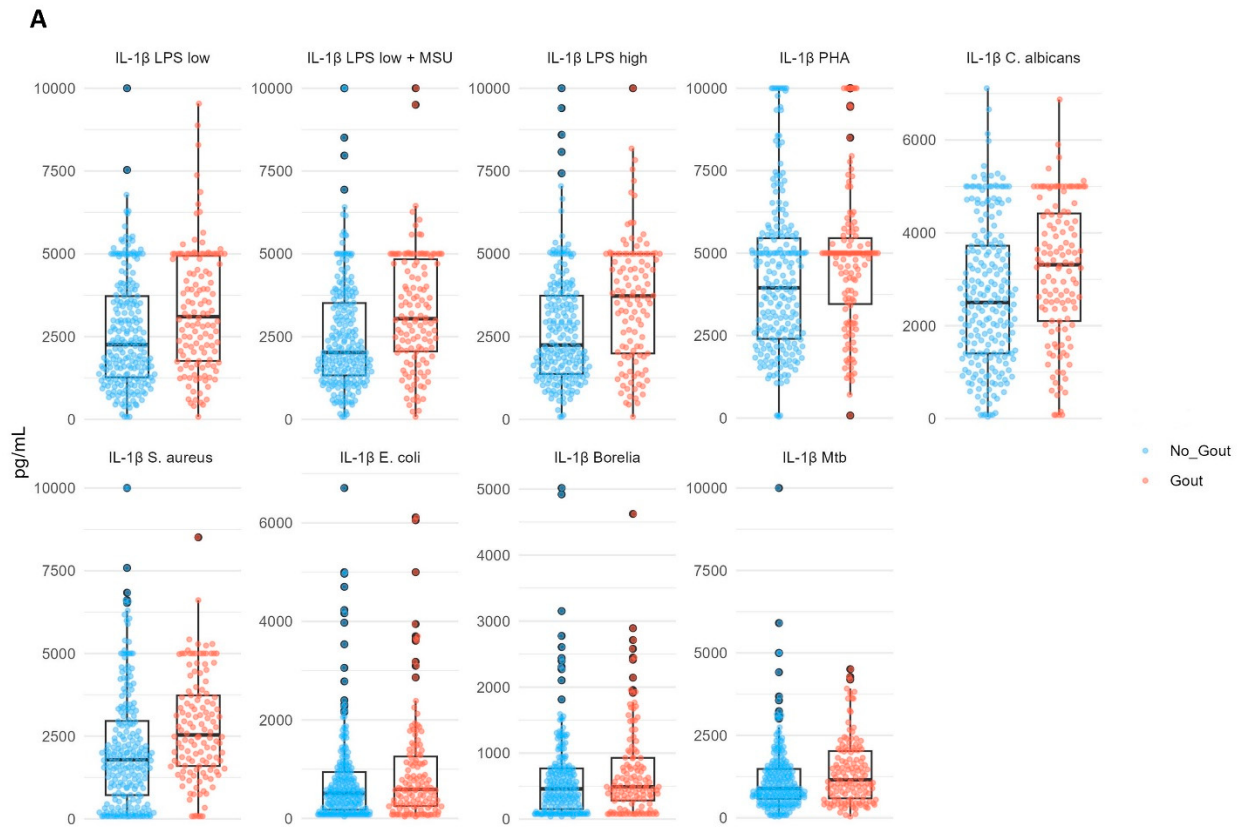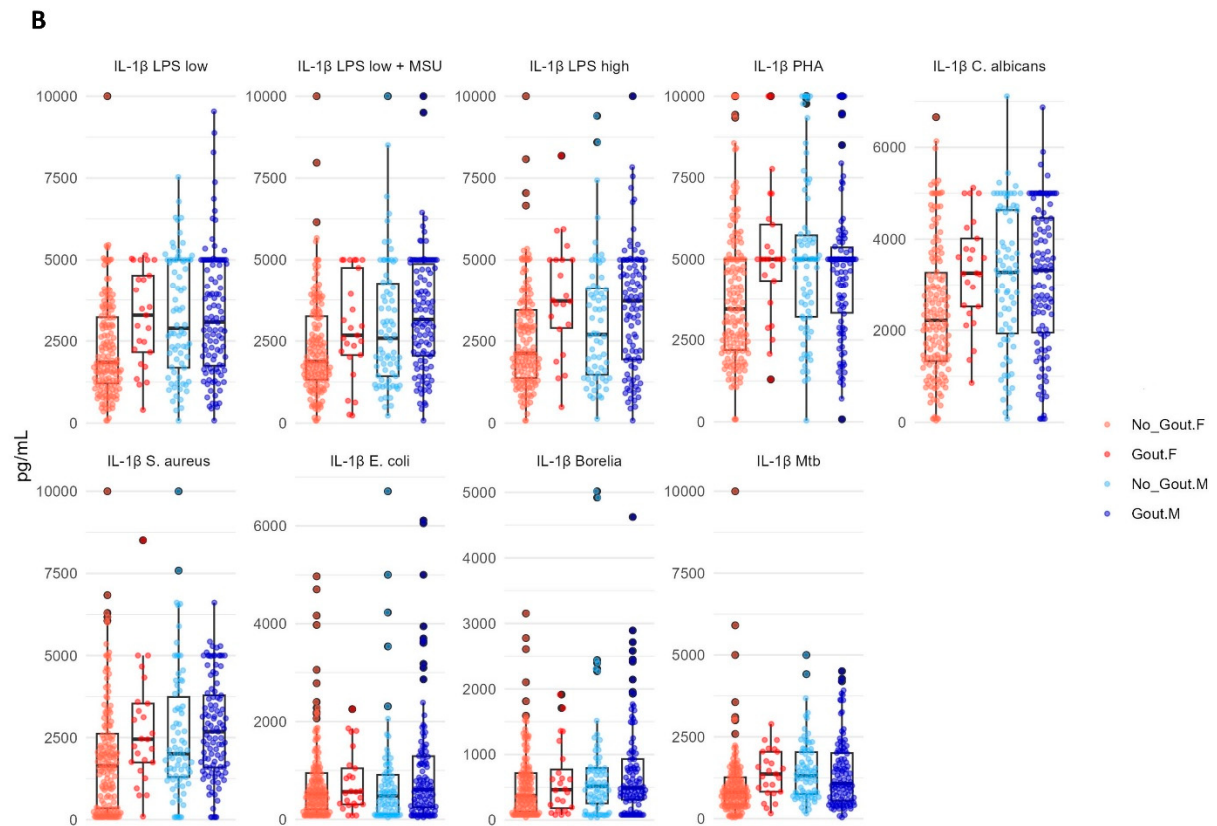

**Supplementary Figure S3.** Box plots showing distribution of IL-1 $\beta$  levels in PBMCs from patients with and without gout (A) and split by sex (B) that were stimulated in vitro for 24h.

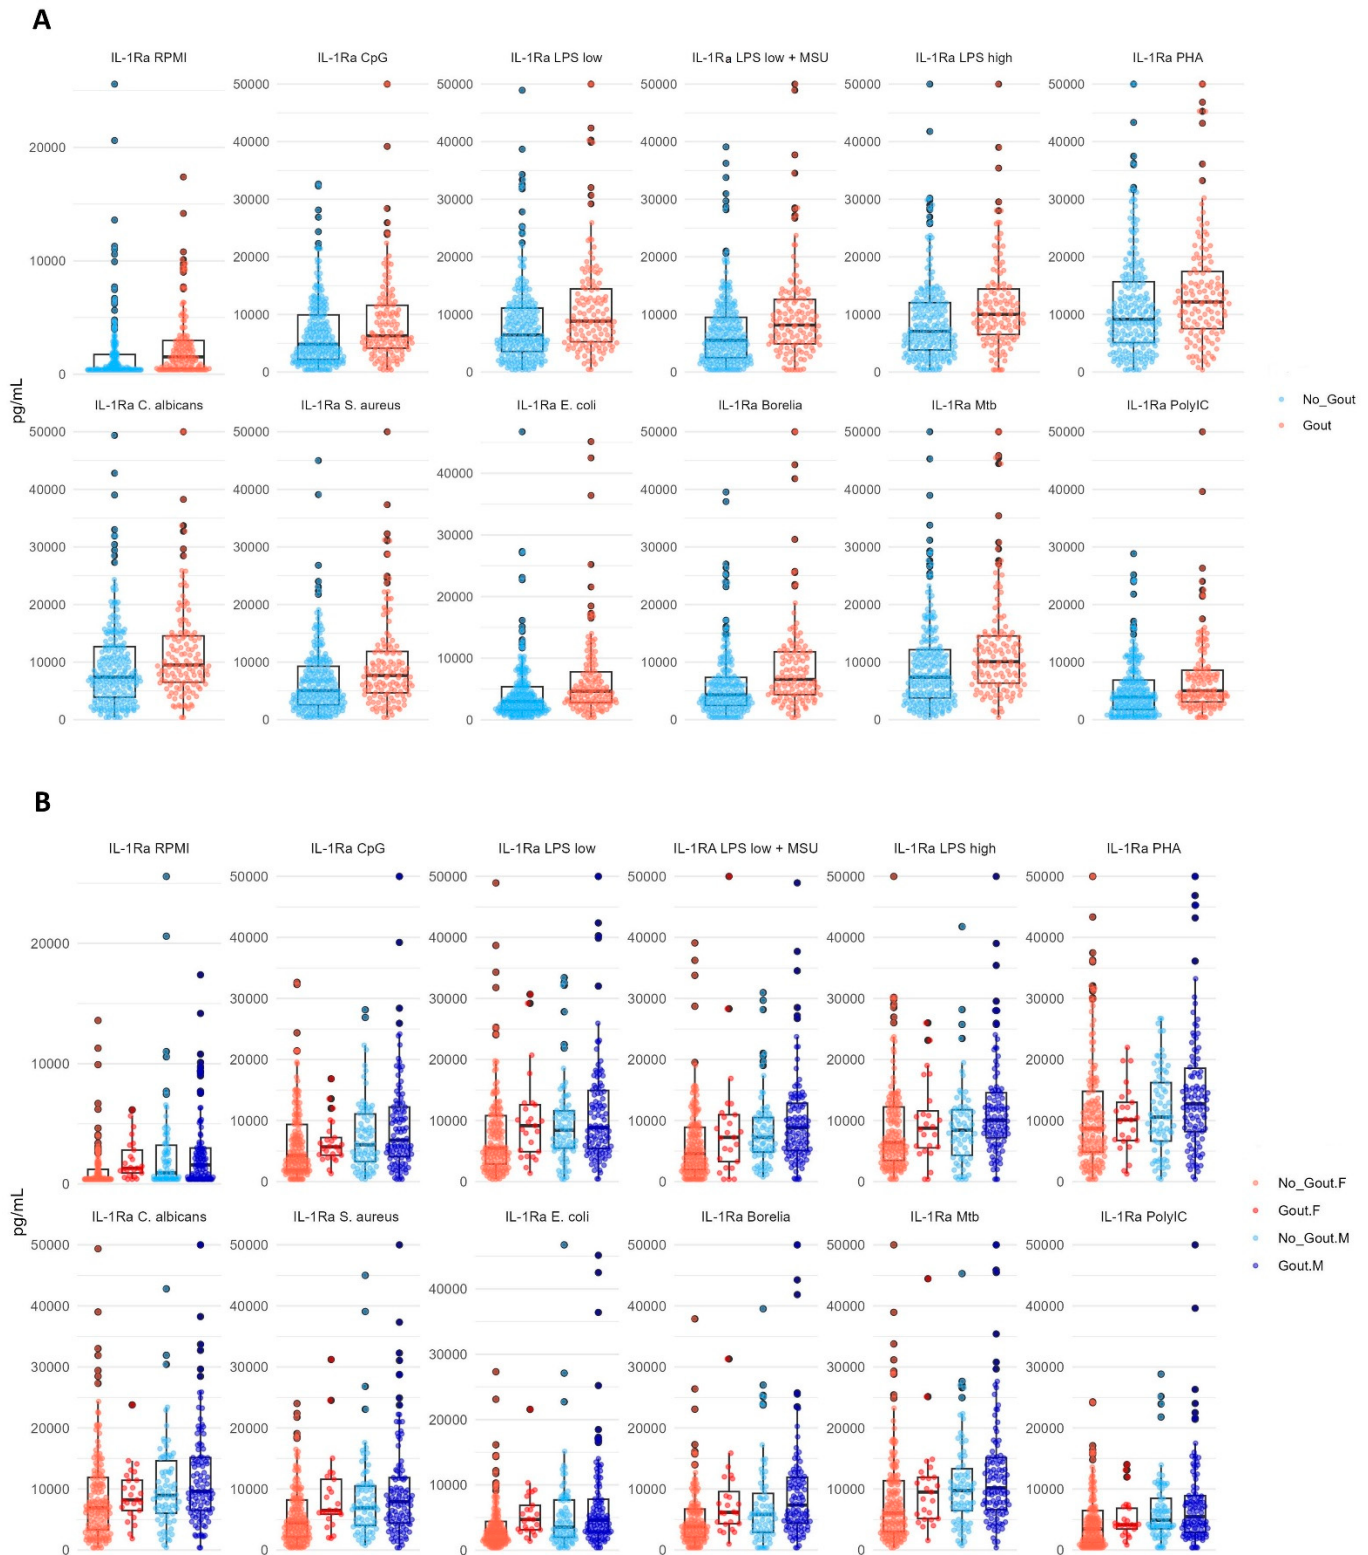

**Supplementary Figure S4.** Box plots showing distribution of IL-1Ra levels in PBMCs from patients with and without gout (**A**) and split by sex (**B**) that were stimulated in vitro for 24h.

**Supplementary Table S3.** Baseline characteristics of the gout and control cohorts in all patients included for experiment 2.

| Characteristic       | <i>n</i> | No_Gout, <i>n</i> = 224 <sup>1</sup> | Gout, <i>n</i> = 131 <sup>1</sup> | <i>p</i> -value <sup>2</sup> |
|----------------------|----------|--------------------------------------|-----------------------------------|------------------------------|
| <b>Sex</b>           | 355      |                                      |                                   | <0.001                       |
| F                    |          | 150 (67%)                            | 25 (19%)                          |                              |
| M                    |          | 74 (33%)                             | 106 (81%)                         |                              |
| <b>Age (years)</b>   | 355      | 61 (53, 68)                          | 63 (55, 68)                       | 0.4                          |
| <b>BMI</b>           | 345      | 28.4 (25.9, 31.6)                    | 30.1 (27.1, 33.2)                 | 0.002                        |
| Unknown              |          | 10                                   | 0                                 |                              |
| <b>Urate (mg/dL)</b> | 355      | 5.20 (4.28, 6.20)                    | 6.70 (5.60, 8.15)                 | <0.001                       |

<sup>1</sup>n (%); Median (IQR); <sup>2</sup>Pearson's Chi-squared test; Wilcoxon rank sum test.

**Supplementary Table S4.** Baseline characteristics only for the gout patients included for experiment 2.

| Characteristic       | <i>n</i> | F, <i>n</i> = 25 <sup>1</sup> | M, <i>n</i> = 106 <sup>1</sup> | <i>p</i> -value <sup>2</sup> |
|----------------------|----------|-------------------------------|--------------------------------|------------------------------|
| <b>Age (years)</b>   | 131      | 66 (62, 71)                   | 61 (52, 67)                    | 0.006                        |
| <b>BMI</b>           | 131      | 30.9 (29.1, 34.9)             | 29.8 (26.9, 32.6)              | 0.15                         |
| <b>Urate (mg/dL)</b> | 131      | 6.60 (5.60, 7.50)             | 6.80 (5.63, 8.70)              | 0.2                          |

<sup>1</sup>Median (IQR); <sup>2</sup>Wilcoxon rank sum test.
